# Supplementary material
Source: publisher figshare collection journal article supplement (https://diabetesjournals.figshare.com/ndownloader/files/33966482)

**Supplemental Figure 1. Forest plots showing adjusted mean difference for hospital length of stay in patients with diabetes within 30 days of COVID-19 diagnosis (n=18,187)**

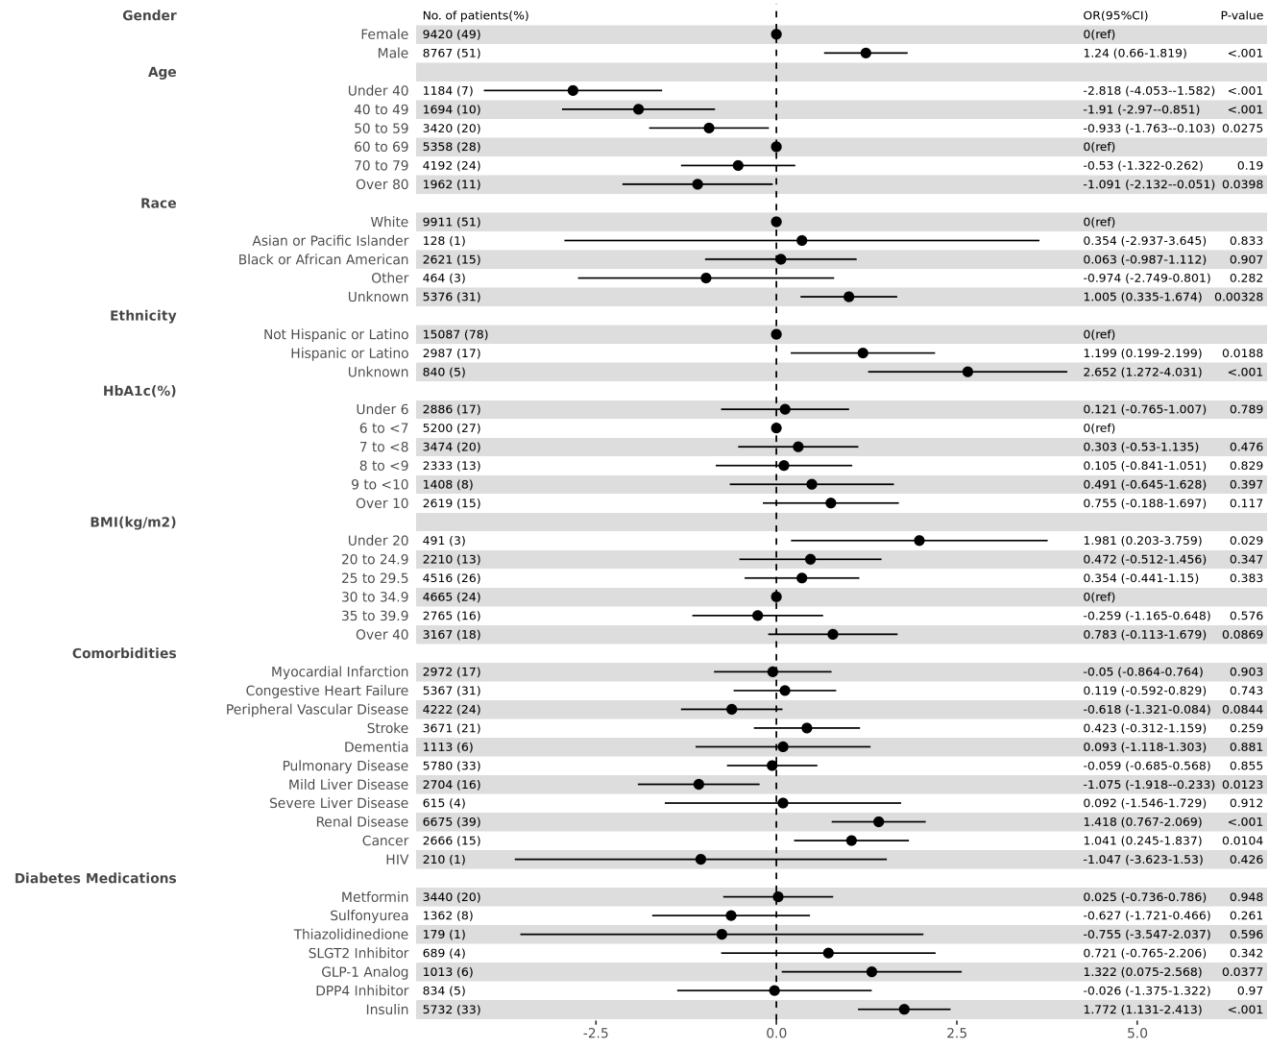

Supplement: Supplementary file 1 [file 33966482]
